# Supplementary material for: Impacts of Land-Use Change on Ecosystem Services Value in the South-to-North Water Diversion Project, China
Source: MDPI journal article supplement (doi:10.3390/ijerph20065069), 2023-03-13
Supplement: s1 [file s1]

**Table S1** Provinces included in four regions.

| Region                 | HAER             | RAER             | HAMR                   | RAMR            |
|------------------------|------------------|------------------|------------------------|-----------------|
| The included provinces | Shanghai         | Shandong         | northwestern Hubei     | Beijing         |
|                        | Zhejiang         | eastern Hebei    | southeastern Shaanxi   | western Tianjin |
|                        | southern Jiangsu | eastern Tianjin  | Southeastern Chongqing | northern Henan  |
|                        |                  | northern Jiangsu | southern Henan         | western Hebei   |

\* HAER-the headwater areas of the east route; RAER-the receiving areas of the east route; HAMR-the headwater areas of the middle route; RAMR- the receiving areas of the middle route.

**Table S2** Areas of land use types in the study area from 2000 to 2020.

| Subarea | Land use types  | Index                    | 2000      | 2005      | 2010      | 2015      | 2020      |
|---------|-----------------|--------------------------|-----------|-----------|-----------|-----------|-----------|
| HAMR    | Cultivated land | Area ( km <sup>2</sup> ) | 41,818.23 | 41,398.50 | 41,265.69 | 40,913.52 | 40,483.62 |
|         |                 | Area proportion (%)      | 30.16     | 29.78     | 29.68     | 29.47     | 29.17     |
|         | Forestry areas  | Area ( km <sup>2</sup> ) | 61,982.99 | 62,198.25 | 62,182.69 | 61,781.06 | 63,068.15 |
|         |                 | Area proportion (%)      | 44.70     | 44.74     | 44.73     | 44.50     | 45.45     |
|         | Grassland       | Area ( km <sup>2</sup> ) | 29,999.92 | 30,178.46 | 30,176.83 | 30,153.68 | 28,876.97 |
|         |                 | Area proportion (%)      | 21.63     | 21.71     | 21.71     | 21.72     | 20.81     |
|         | Water areas     | Area ( km <sup>2</sup> ) | 2350.48   | 2709.26   | 2742.24   | 2825.25   | 3079.02   |
|         |                 | Area proportion (%)      | 1.69      | 1.95      | 1.97      | 2.04      | 2.22      |
|         | Built-up areas  | Area ( km <sup>2</sup> ) | 1786.86   | 1915.62   | 2005.02   | 2473.35   | 2678.47   |
|         |                 | Area proportion (%)      | 1.29      | 1.38      | 1.44      | 1.78      | 1.93      |
|         | Unused land     | Area ( km <sup>2</sup> ) | 38.74     | 38.97     | 38.97     | 44.70     | 43.86     |
|         |                 | Area proportion (%)      | 0.03      | 0.03      | 0.03      | 0.03      | 0.03      |
|         | Wetland         | Area ( km <sup>2</sup> ) | 699.88    | 584.20    | 610.72    | 640.01    | 536.18    |
|         |                 | Area proportion (%)      | 0.50      | 0.42      | 0.44      | 0.46      | 0.39      |

|      |                 |                          |            |            |            |            |            |
|------|-----------------|--------------------------|------------|------------|------------|------------|------------|
| HAER | Cultivated land | Area ( km <sup>2</sup> ) | 34,340.51  | 32,754.78  | 31,390.14  | 30,347.18  | 27,397.84  |
|      |                 | Area proportion (%)      | 65.16      | 61.90      | 59.32      | 57.51      | 51.97      |
|      | Forestry areas  | Area ( km <sup>2</sup> ) | 4157.01    | 4180.85    | 4175.38    | 4072.63    | 4080.03    |
|      |                 | Area proportion (%)      | 7.89       | 7.90       | 7.89       | 7.72       | 7.74       |
|      | Grassland       | Area ( km <sup>2</sup> ) | 245.48     | 243.63     | 241.27     | 312.93     | 321.41     |
|      |                 | Area proportion (%)      | 0.47       | 0.46       | 0.46       | 0.59       | 0.61       |
|      | Water areas     | Area ( km <sup>2</sup> ) | 7818.62    | 8079.11    | 8077.45    | 7947.56    | 7897.32    |
|      |                 | Area proportion (%)      | 14.84      | 15.27      | 15.27      | 15.06      | 14.98      |
|      | Built-up areas  | Area ( km <sup>2</sup> ) | 5540.55    | 7153.34    | 8515.51    | 9543.12    | 12,436.03  |
|      |                 | Area proportion (%)      | 10.51      | 13.52      | 16.09      | 18.09      | 23.59      |
|      | Unused land     | Area ( km <sup>2</sup> ) | 14.56      | 15.93      | 15.29      | 12.73      | 48.79      |
|      |                 | Area proportion (%)      | 0.03       | 0.03       | 0.03       | 0.02       | 0.09       |
|      | Wetland         | Area ( km <sup>2</sup> ) | 582.17     | 491.60     | 497.84     | 531.39     | 541.87     |
|      |                 | Area proportion (%)      | 1.10       | 0.93       | 0.94       | 1.01       | 1.03       |
| RAMR | Cultivated land | Area ( km <sup>2</sup> ) | 124,980.66 | 123,834.48 | 123,264.04 | 122,371.71 | 114,758.09 |
|      |                 | Area proportion (%)      | 68.15      | 67.34      | 67.03      | 66.59      | 62.66      |
|      | Forestry areas  | Area ( km <sup>2</sup> ) | 21,474.06  | 21,583.05  | 21,587.86  | 21,415.50  | 21,745.74  |
|      |                 | Area proportion (%)      | 11.71      | 11.74      | 11.74      | 11.65      | 11.87      |
|      | Grassland       | Area ( km <sup>2</sup> ) | 16,113.06  | 16,094.82  | 16,032.69  | 15,983.74  | 15,579.51  |
|      |                 | Area proportion (%)      | 8.79       | 8.75       | 8.72       | 8.70       | 8.51       |
|      | Water areas     | Area ( km <sup>2</sup> ) | 2250.60    | 2396.37    | 2357.28    | 2423.49    | 3152.66    |
|      |                 | Area proportion (%)      | 1.23       | 1.30       | 1.28       | 1.32       | 1.72       |
|      | Built-up areas  | Area ( km <sup>2</sup> ) | 16,849.76  | 18,308.47  | 18,927.21  | 19,818.09  | 26,705.43  |
|      |                 | Area proportion (%)      | 9.19       | 9.96       | 10.29      | 10.78      | 14.58      |

|                 |                          |            |            |            |            |            |
|-----------------|--------------------------|------------|------------|------------|------------|------------|
| Unused land     | Area ( km <sup>2</sup> ) | 63.61      | 46.98      | 47.58      | 48.39      | 25.59      |
|                 | Area proportion (%)      | 0.03       | 0.03       | 0.03       | 0.03       | 0.01       |
| Wetland         | Area ( km <sup>2</sup> ) | 1671.88    | 1640.75    | 1686.81    | 1701.15    | 1163.51    |
|                 | Area proportion (%)      | 0.91       | 0.89       | 0.92       | 0.93       | 0.64       |
| Cultivated land | Area ( km <sup>2</sup> ) | 127,693.87 | 126,531.32 | 125,176.01 | 124,206.44 | 121,978.53 |
|                 | Area proportion (%)      | 70.50      | 69.53      | 69.03      | 68.50      | 67.33      |
| Forestry areas  | Area ( km <sup>2</sup> ) | 8320.24    | 8341.73    | 8343.06    | 8336.01    | 7538.46    |
|                 | Area proportion (%)      | 4.59       | 4.58       | 4.60       | 4.60       | 4.16       |
| Grassland       | Area ( km <sup>2</sup> ) | 10,456.94  | 10,456.94  | 9793.74    | 9807.12    | 6772.29    |
|                 | Area proportion (%)      | 5.77       | 5.75       | 5.40       | 5.41       | 3.74       |
| Water areas     | Area ( km <sup>2</sup> ) | 7597.55    | 8196.02    | 8223.47    | 8202.48    | 12,064.39  |
|                 | Area proportion (%)      | 4.19       | 4.50       | 4.53       | 4.52       | 6.66       |
| Built-up areas  | Area ( km <sup>2</sup> ) | 22,422.98  | 24,536.37  | 26,004.42  | 26,963.16  | 30,181.36  |
|                 | Area proportion (%)      | 12.38      | 13.48      | 14.34      | 14.87      | 16.66      |
| Unused land     | Area ( km <sup>2</sup> ) | 1941.77    | 1529.46    | 1398.19    | 1404.38    | 259.34     |
|                 | Area proportion (%)      | 1.07       | 0.84       | 0.77       | 0.77       | 0.14       |
| Wetland         | Area ( km <sup>2</sup> ) | 2695.74    | 2376.99    | 2407.70    | 2406.11    | 2363.82    |
| RAER            | Area proportion (%)      | 1.49       | 1.31       | 1.33       | 1.33       | 1.30       |

**Table S3** Land-use transfer matrix in the HAMR (km<sup>2</sup>).

| Time          | Type      | Grass-<br>land | Cultivated<br>land | Built-up<br>areas | Forestry<br>land | Wet-<br>land | Water<br>areas | Unused<br>land | Transfer<br>out |
|---------------|-----------|----------------|--------------------|-------------------|------------------|--------------|----------------|----------------|-----------------|
| 2000–20<br>05 | Grassland | 29,989.4<br>8  | 20.38              | 3.55              | 44.53            | 0            | 5.94           | 0              | 74.40           |

|           |                 |           |           |         |           |        |         |       |         |
|-----------|-----------------|-----------|-----------|---------|-----------|--------|---------|-------|---------|
|           | Cultivated land | 150.04    | 41,304.37 | 118.70  | 81.06     | 23.91  | 233.54  | 0     | 607.24  |
|           | Built-up areas  | 0.03      | 12.34     | 1772.45 | 0.03      | 0.97   | 4.62    | 0     | 17.99   |
|           | Forestry land   | 37.29     | 26.79     | 9.89    | 62,064.51 | 0      | 20.57   | 0     | 94.54   |
|           | Wetland         | 0.25      | 8.74      | 4.79    | 5.81      | 539.46 | 143.50  | 0     | 163.09  |
|           | Water areas     | 1.37      | 25.88     | 6.25    | 2.31      | 19.86  | 2301.09 | 0     | 55.68   |
|           | Unused land     | 0         | 0         | 0       | 0         | 0      | 0       | 38.97 | 0       |
|           | Transfer into   | 188.98    | 94.13     | 143.17  | 133.74    | 44.73  | 408.17  | 0     | — —     |
| <hr/>     |                 |           |           |         |           |        |         |       |         |
| 2005–2010 | Grassland       | 30,163.58 | 3.10      | 0.48    | 9.26      | 0      | 2.03    | 0     | 14.87   |
|           | Cultivated land | 6.15      | 41,215.94 | 77.31   | 27.78     | 7.23   | 63.12   | 0     | 181.59  |
|           | Built-up areas  | 0         | 12.16     | 1902.57 | 0.28      | 0.24   | 0.37    | 0     | 13.05   |
|           | Forestry land   | 7.09      | 17.61     | 20.80   | 62,144.72 | 2.53   | 5.37    | 0     | 53.41   |
|           | Wetland         | 0         | 1.83      | 0.44    | 0         | 568.20 | 13.73   | 0     | 16.00   |
|           | Water areas     | 0         | 15.05     | 3.42    | 0.66      | 32.52  | 2657.61 | 0.00  | 51.64   |
|           | Unused land     | 0         | 0         | 0       | 0         | 0      | 0       | 38.97 | 0       |
|           | Transfer into   | 13.25     | 49.75     | 102.44  | 37.98     | 42.52  | 84.62   | 0     | — —     |
| <hr/>     |                 |           |           |         |           |        |         |       |         |
| 2010–2015 | Grassland       | 27,872.21 | 727.11    | 36.53   | 1449.98   | 19.17  | 36.10   | 2.25  | 2271.14 |

|               |                    |               |           |         |           |        |         |       |           |
|---------------|--------------------|---------------|-----------|---------|-----------|--------|---------|-------|-----------|
|               | Cultivated<br>land | 655.69        | 33,537.41 | 1341.33 | 4393.10   | 215.40 | 1050.78 | 11.95 | 7668.25   |
|               | Built-up<br>areas  | 18.45         | 1023.28   | 703.54  | 91.98     | 26.88  | 137.87  | 0.07  | 1298.53   |
|               | Forestry<br>land   | 1552.34       | 4485.12   | 200.31  | 55,482.04 | 64.93  | 304.55  | 5.89  | 6613.14   |
|               | Wetland            | 13.88         | 205.95    | 43.28   | 73.91     | 181.41 | 90.39   | 0     | 427.41    |
|               | Water areas        | 40.70         | 929.70    | 148.36  | 279.61    | 132.22 | 1204.55 | 2.61  | 1533.19   |
|               | Unused<br>land     | 0.41          | 4.96      | 0       | 10.44     | 0      | 1.00    | 21.93 | 16.81     |
|               | Transfer<br>into   | 2281.47       | 7376.11   | 1769.81 | 6299.02   | 458.60 | 1620.70 | 22.77 | — —       |
| 2015–20<br>20 | Grassland          | 14,107.0<br>3 | 6640.67   | 153.50  | 9036.17   | 15.32  | 142.08  | 5.59  | 15,993.32 |
|               | Cultivated<br>land | 6332.78       | 23,561.26 | 1599.00 | 7895.43   | 220.61 | 1264.19 | 6.01  | 17,318.02 |
|               | Built-up<br>areas  | 115.74        | 1434.32   | 510.89  | 214.90    | 42.85  | 153.99  | 0     | 1961.80   |
|               | Forestry<br>land   | 8158.69       | 7407.85   | 211.35  | 45,445.13 | 54.66  | 358.62  | 10.76 | 16,201.93 |
|               | Wetland            | 25.09         | 256.73    | 38.11   | 75.73     | 90.99  | 152.30  | 0.00  | 547.97    |
|               | Water areas        | 92.11         | 1133.88   | 157.01  | 325.54    | 111.30 | 1002.30 | 1.31  | 1821.16   |
|               | Unused<br>land     | 5.55          | 9.24      | 0.03    | 9.22      | 0      | 0.47    | 20.19 | 24.51     |
|               | Transfer<br>into   | 14,729.9<br>8 | 16,882.70 | 2159.00 | 17,556.98 | 444.73 | 2071.64 | 23.67 | — —       |

**Table S4** Land-use transfer matrix in the HAER (km<sup>2</sup>).

| Time          | Type                    | Grass-<br>land | Cultivated<br>land | Built-up<br>areas | Forestry<br>land | Wet-<br>land | Water<br>areas | Unused<br>land | Transfer<br>out |
|---------------|-------------------------|----------------|--------------------|-------------------|------------------|--------------|----------------|----------------|-----------------|
| 2000–20<br>05 | Grass-<br>land          | 231.50         | 7.13               | 4.32              | 2.00             | 0.35         | 1.83           | 0.68           | 16.3<br>1       |
|               | Culti-<br>vated<br>land | 0.83           | 32,355.18          | 1684.70           | 40.97            | 3.75         | 317.98         | 0              | 2048<br>.23     |
|               | Built-up<br>areas       | 0.03           | 167.14             | 5371.07           | 0.50             | 0            | 14.25          | 0              | 181.<br>92      |
|               | Forestry<br>land        | 0              | 23.72              | 19.64             | 4129.19          | 0            | 0.73           | 0.68           | 44.7<br>8       |
|               | Wetland                 | 1.42           | 35.86              | 22.76             | 0                | 474.82       | 69.62          | 0              | 129.<br>66      |
|               | Water<br>areas          | 9.21           | 121.74             | 49.28             | 0.08             | 7.08         | 7661.61        | 0              | 187.<br>38      |
|               | Unused<br>land          | 0              | 0                  | 0                 | 0                | 0            | 0              | 14.56          | 0               |
|               | Transfer<br>into        | 11.48          | 355.59             | 1780.70           | 43.55            | 11.18        | 404.40         | 1.37           | — —             |
| 2005–20<br>10 | Grass-<br>land          | 238.06         | 1.00               | 1.39              | 0.03             | 0            | 2.49           | 0              | 4.92            |
|               | Culti-<br>vated<br>land | 0.64           | 31,129.10          | 1457.03           | 29.98            | 2.89         | 88.08          | 0              | 1578<br>.62     |
|               | Built-up<br>areas       | 0.03           | 171.65             | 6973.36           | 0.96             | 0            | 5.77           | 0              | 178.<br>41      |
|               | Forestry                | 1.39           | 12.81              | 22.79             | 4135.30          | 0            | 0.38           | 0              | 37.3            |

|           |                  |        |           |         |         |        |         |       |         |
|-----------|------------------|--------|-----------|---------|---------|--------|---------|-------|---------|
|           | land             |        |           |         |         |        |         |       | 6       |
|           | Wetland          | 0      | 2.37      | 3.94    | 0.00    | 470.59 | 8.84    | 0     | 15.16   |
|           | Water areas      | 0.49   | 31.37     | 55.42   | 0.00    | 17.62  | 7960.30 | 0.39  | 105.29  |
|           | Unused land      | 0      | 0         | 0       | 1.00    | 0      | 0.03    | 14.90 | 1.03    |
|           | Transfer into    | 2.55   | 219.20    | 1540.59 | 31.97   | 20.51  | 105.59  | 0.39  | — —     |
| 2010–2015 | Grass-land       | 168.58 | 8.02      | 8.99    | 45.57   | 0      | 4.84    | 0     | 67.41   |
|           | Culti-vated land | 21.46  | 28,177.38 | 2204.53 | 454.30  | 43.15  | 390.34  | 0.40  | 3114.17 |
|           | Built-up areas   | 4.71   | 1228.92   | 7078.61 | 68.36   | 6.19   | 102.31  | 1.73  | 1412.21 |
|           | Forestry land    | 49.56  | 505.44    | 93.53   | 3463.63 | 2.56   | 39.59   | 1.87  | 692.55  |
|           | Wetland          | 8.73   | 21.74     | 6.41    | 4.28    | 393.50 | 46.58   | 0     | 87.74   |
|           | Water areas      | 59.85  | 368.28    | 147.86  | 28.84   | 84.90  | 7355.54 | 0.03  | 689.76  |
|           | Unused land      | 0      | 1.00      | 2.00    | 1.35    | 0      | 2.23    | 8.71  | 6.58    |
|           | Transfer into    | 144.30 | 2133.40   | 2463.32 | 602.70  | 136.80 | 585.88  | 4.02  | — —     |
| 2015–2020 | Grass-land       | 57.10  | 68.78     | 46.02   | 47.82   | 27.52  | 64.55   | 0     | 254.68  |
|           | Culti-           | 83.65  | 21,647.36 | 5902.81 | 892.79  | 135.71 | 1570.29 | 28.09 | 8613    |

|                |        |         |         |         |        |         |       |      |     |
|----------------|--------|---------|---------|---------|--------|---------|-------|------|-----|
| vated          |        |         |         |         |        |         |       |      | .33 |
| land           |        |         |         |         |        |         |       |      |     |
| Built-up areas | 31.32  | 3290.35 | 5497.85 | 193.12  | 21.13  | 497.49  | 2.81  | 4036 | .21 |
| Forestry land  | 46.93  | 787.80  | 240.59  | 2836.29 | 11.94  | 114.25  | 11.97 | 1213 | .47 |
| Wetland        | 11.93  | 170.08  | 36.36   | 4.31    | 149.65 | 153.85  | 0     | 376. | 53  |
| Water areas    | 85.59  | 1371.54 | 679.06  | 89.88   | 194.56 | 5481.88 | 5.28  | 2425 | .91 |
| Unused land    | 0      | 4.32    | 1.62    | 4.63    | 0      | 1.51    | 0.64  | 12.0 | 9   |
| Transfer into  | 259.41 | 5692.86 | 6906.46 | 1232.55 | 390.86 | 2401.94 | 48.15 | —    | —   |

**Table S5** Land-use transfer matrix in the RAMR (km<sup>2</sup>).

| Time      | Type            | Grass-land | Cultivated land | Built-up areas | Forestry land | Wet-land | Water areas | Unused land | Transfer out |
|-----------|-----------------|------------|-----------------|----------------|---------------|----------|-------------|-------------|--------------|
| 2000–2005 | Grassland       | 15,969.81  | 65.46           | 46.03          | 36.58         | 1.85     | 28.16       | 0           | 178.08       |
|           | Cultivated land | 67.67      | 122,555.85      | 1985.46        | 108.11        | 75.12    | 420.72      | 3.09        | 2660.17      |
|           | Built-up areas  | 10.82      | 670.53          | 16,147.06      | 10.99         | 3.13     | 38.65       | 0.01        | 734.12       |
|           | Forestry land   | 23.99      | 85.80           | 57.37          | 21,338.12     | 4.30     | 15.02       | 0           | 186.48       |
|           | Wetland         | 2.77       | 113.57          | 7.93           | 11.89         | 1446.36  | 100.64      | 0           | 236.80       |
|           | Water areas     | 13.88      | 277.88          | 64.30          | 6.77          | 109.99   | 1790.71     | 0           | 472.82       |
|           | Unused land     | 0          | 17.28           | 0.20           | 0.16          | 0        | 2.33        | 43.88       | 19.98        |



|           |                 |           |            |           |           |         |         |       |         |
|-----------|-----------------|-----------|------------|-----------|-----------|---------|---------|-------|---------|
|           | Transfer into   | 119.13    | 1230.52    | 2161.29   | 174.51    | 194.39  | 605.52  | 3.09  | — —     |
| 2005–2010 | Grassland       | 15,990.72 | 15.07      | 41.15     | 32.79     | 6.59    | 2.61    | 0     | 98.22   |
|           | Cultivated land | 20.40     | 122,970.89 | 663.51    | 19.71     | 38.63   | 72.29   | 0.72  | 815.24  |
|           | Built-up areas  | 0.25      | 127.86     | 18,176.10 | 0.37      | 0.31    | 3.47    | 0     | 132.25  |
|           | Forestry land   | 13.82     | 5.47       | 27.57     | 21,462.81 | 2.96    | 0       | 0     | 49.81   |
|           | Wetland         | 0.59      | 68.47      | 9.89      | 1.75      | 1518.49 | 41.10   | 0     | 121.80  |
|           | Water areas     | 1.04      | 28.49      | 8.88      | 0         | 119.83  | 2237.68 | 0     | 158.25  |
|           | Unused land     | 0         | 0.11       | 0         | 0         | 0       | 0       | 46.87 | 0.11    |
|           | Transfer into   | 36.10     | 245.48     | 751.00    | 54.62     | 168.32  | 119.46  | 0.72  | — —     |
| 2010–2015 | Grassland       | 13,973.11 | 1256.88    | 134.59    | 584.08    | 32.71   | 32.77   | 5.39  | 2046.42 |
|           | Cultivated land | 1109.91   | 11,3491.89 | 6510.02   | 1112.40   | 334.43  | 576.53  | 10.00 | 9653.29 |
|           | Built-up areas  | 85.51     | 5688.23    | 12,945.53 | 78.77     | 33.34   | 82.04   | 1.00  | 5968.90 |
|           | Forestry land   | 733.43    | 1115.37    | 88.14     | 19,500.20 | 45.01   | 19.62   | 1.64  | 2003.21 |
|           | Wetland         | 38.16     | 299.98     | 37.98     | 54.85     | 1205.38 | 48.34   | 0     | 479.31  |
|           | Water areas     | 38.30     | 479.42     | 100.83    | 19.16     | 50.22   | 1663.54 | 0     | 687.93  |
|           | Unused land     | 1.00      | 12.21      | 1.01      | 2.10      | 0       | 0.75    | 30.36 | 17.07   |
|           | Transfer into   | 2006.31   | 8852.09    | 6872.56   | 1851.36   | 495.72  | 760.06  | 18.03 | — —     |
| 2015–2020 | Grassland       | 8364.39   | 3279.84    | 760.49    | 3112.80   | 140.34  | 182.13  | 7.85  | 7483.46 |

|                 |         |           |           |           |        |         |       |           |
|-----------------|---------|-----------|-----------|-----------|--------|---------|-------|-----------|
| Cultivated land | 3924.71 | 95,817.04 | 17,554.45 | 2709.78   | 535.87 | 1655.87 | 8.28  | 26,388.97 |
| Built-up areas  | 437.11  | 11,356.95 | 7304.52   | 365.16    | 68.97  | 264.54  | 3.41  | 12,496.15 |
| Forestry land   | 2545.86 | 2291.83   | 591.42    | 15,352.28 | 56.10  | 162.98  | 2.95  | 5651.13   |
| Wetland         | 146.69  | 816.90    | 173.75    | 100.60    | 242.00 | 220.05  | 0.49  | 1458.49   |
| Water areas     | 147.96  | 1098.10   | 296.74    | 91.80     | 119.08 | 665.56  | 1.02  | 1754.69   |
| Unused land     | 7.62    | 31.09     | 3.76      | 3.09      | 1.00   | 0.24    | 1.59  | 46.79     |
| Transfer into   | 7209.94 | 18,874.70 | 19,380.63 | 6383.23   | 921.36 | 2485.82 | 24.00 | — —       |

**Table S6** Land-use transfer matrix in the RAER (km<sup>2</sup>).

| Time      | Type            | Grass-land | Cultivated land | Built-up areas | Forestry land | Wet-land | Water areas | Unused land | Trans-fer out |
|-----------|-----------------|------------|-----------------|----------------|---------------|----------|-------------|-------------|---------------|
| 2000–2005 | Grassland       | 4098.49    | 3782.34         | 668.18         | 1389.92       | 130.53   | 267.08      | 120.75      | 6358.81       |
|           | Cultivated land | 3373.82    | 109,831.12      | 9728.36        | 2213.42       | 452.69   | 1593.39     | 579.33      | 17,941.02     |
|           | Built-up areas  | 564.52     | 8169.07         | 12,811.56      | 288.63        | 150.52   | 308.83      | 126.18      | 9607.75       |
|           | Forestry land   | 1438.20    | 2137.93         | 304.64         | 4321.61       | 22.26    | 75.06       | 16.56       | 3994.64       |
|           | Wetland         | 115.99     | 501.22          | 236.51         | 35.84         | 1459.46  | 326.89      | 30.50       | 1246.96       |
|           | Water areas     | 152.93     | 1303.79         | 404.96         | 53.25         | 110.52   | 5514.69     | 68.22       | 2093.67       |
|           | Unused land     | 93.63      | 752.62          | 343.28         | 24.40         | 40.88    | 106.09      | 585.71      | 1360.91       |
|           | Transfer        | 5739.10    | 16,646.97       | 11,685.93      | 4005.45       | 907.41   | 2677.36     | 941.54      | — —           |

into

|        |                    |         |            |           |         |         |         |         |         |
|--------|--------------------|---------|------------|-----------|---------|---------|---------|---------|---------|
| 2005–2 | Grassland          | 9758.47 | 12.08      | 45.69     | 0       | 9.98    | 11.25   | 0.03    | 79.04   |
| 010    | Cultivated<br>land | 14.87   | 124,856.22 | 1434.51   | 27.86   | 19.70   | 115.92  | 6.35    | 1619.21 |
|        | Built-up<br>areas  | 1.66    | 196.29     | 24,233.91 | 0.39    | 11.42   | 39.67   | 10.57   | 260.00  |
|        | Forestry<br>land   | 0.97    | 6.68       | 17.18     | 8300.13 | 1.39    | 0.72    | 0       | 26.94   |
|        | Wetland            | 1.75    | 14.74      | 25.51     | 0.03    | 2303.65 | 14.48   | 0       | 56.51   |
|        | Water areas        | 1.81    | 26.29      | 94.56     | 0       | 51.73   | 8017.04 | 0.57    | 174.97  |
|        | Unused<br>land     | 0.88    | 12.33      | 116.03    | 0       | 0.39    | 19.11   | 1378.46 | 148.74  |
|        | Transfer<br>into   | 21.94   | 268.40     | 1733.49   | 28.27   | 94.62   | 201.16  | 17.53   | — —     |
| 2010–2 | Grassland          | 9743.36 | 7.26       | 23.17     | 0.25    | 0       | 5.36    | 1.00    | 37.04   |
| 015    | Cultivated<br>land | 22.94   | 123,912.03 | 1071.11   | 23.10   | 7.57    | 69.70   | 7.31    | 1201.73 |
|        | Built-up<br>areas  | 16.43   | 196.25     | 25,751.85 | 0.70    | 1.92    | 2.92    | 1.05    | 219.27  |
|        | Forestry<br>land   | 1.16    | 5.71       | 21.75     | 8296.74 | 0       | 3.03    | 0       | 31.66   |
|        | Wetland            | 0       | 4.82       | 9.76      | 0.25    | 2452.88 | 10.96   | 8.07    | 33.85   |
|        | Water areas        | 11.09   | 26.42      | 50.44     | 0       | 24.58   | 8101.72 | 2.09    | 114.62  |
|        | Unused<br>land     | 0       | 5.21       | 3.44      | 1.00    | 0       | 3.68    | 1382.65 | 13.33   |
|        | Transfer<br>into   | 51.62   | 245.66     | 1179.66   | 25.30   | 34.08   | 95.65   | 19.52   | — —     |
| 2015–2 | Grassland          | 2187.65 | 4457.35    | 963.65    | 1401.82 | 268.02  | 444.55  | 46.80   | 7582.19 |

|     |                 |         |           |           |         |         |         |        |           |
|-----|-----------------|---------|-----------|-----------|---------|---------|---------|--------|-----------|
| 020 | Cultivated land | 2614.84 | 96,628.79 | 17,926.75 | 2666.21 | 687.58  | 3269.99 | 88.21  | 27,253.57 |
|     | Built-up areas  | 419.88  | 13,614.07 | 9132.38   | 441.00  | 248.93  | 2934.40 | 49.00  | 17,707.28 |
|     | Forestry land   | 1275.19 | 3136.42   | 776.27    | 2862.27 | 57.57   | 156.03  | 27.80  | 5429.28   |
|     | Wetland         | 55.26   | 839.23    | 289.21    | 39.69   | 743.37  | 494.26  | 4.42   | 1722.07   |
|     | Water areas     | 159.27  | 2462.45   | 839.10    | 87.98   | 227.69  | 4367.94 | 18.81  | 3795.31   |
|     | Unused land     | 43.48   | 711.93    | 174.94    | 12.41   | 99.45   | 326.66  | 23.47  | 1368.87   |
|     | Transfer into   | 4567.93 | 25,221.44 | 20,969.92 | 4649.11 | 1589.24 | 7625.89 | 235.05 | —         |

**Table S7** Values of all ecosystem services functions in the HAMR (million yuan).

| Type      | FP      | RMP     | GR        | CR        | HR        | WT        | SC        | BM        | ALP     |
|-----------|---------|---------|-----------|-----------|-----------|-----------|-----------|-----------|---------|
| 2000      | 2907.09 | 9054.19 | 14,100.63 | 14,354.06 | 15,687.12 | 9761.07   | 15,000.03 | 15,689.01 | 7112.21 |
| 2005      | 2896.89 | 9054.92 | 14,091.17 | 14,310.01 | 15,904.28 | 9899.61   | 14,979.03 | 15,713.93 | 7158.62 |
| 2010      | 2892.30 | 9050.72 | 14,087.20 | 14,323.38 | 15,943.39 | 9933.14   | 14,970.42 | 15,714.30 | 7169.05 |
| 2015      | 2875.51 | 8999.19 | 14,013.36 | 14,278.30 | 16,002.99 | 9999.32   | 14,888.45 | 15,652.80 | 7167.84 |
| 2020      | 2860.40 | 9098.34 | 14,117.58 | 14,309.26 | 16,172.45 | 10,033.86 | 14,950.64 | 15,764.64 | 7228.95 |
| 2000–2005 | −10.20  | 0.73    | −9.47     | −44.05    | 217.17    | 138.55    | −21.00    | 24.92     | 46.41   |
| 2005–2010 | −4.59   | −4.20   | −3.96     | 13.37     | 39.10     | 33.53     | −8.61     | 0.37      | 10.43   |
| 2010–2015 | −16.79  | −51.53  | −73.85    | −45.08    | 59.61     | 66.18     | −81.97    | −61.50    | −1.21   |
| 2015–2020 | −15.12  | 99.16   | 104.22    | 30.96     | 169.45    | 34.54     | 62.19     | 111.84    | 61.11   |

\* FP-food production; RMP-raw material production; GR-gas regulation; CR-climate regulation; HR-hydrology regulation; WT-waste treatment; SC-soil conservation; BM-biodiversity maintenance; ALP-aesthetic landscape provision.

**Table S8** Values of all ecosystem services functions in the HAER (million yuan).

| Type      | FP      | RMP     | GR      | CR      | HR      | WT      | SC      | BM      | ALP     |
|-----------|---------|---------|---------|---------|---------|---------|---------|---------|---------|
| 2000      | 2037.82 | 1561.50 | 2610.98 | 3566.80 | 6266.83 | 6099.21 | 3894.61 | 3784.37 | 1790.40 |
| 2005      | 1974.85 | 1537.41 | 2556.01 | 3460.97 | 6359.87 | 6103.47 | 3790.12 | 3735.63 | 1805.93 |
| 2010      | 1917.74 | 1514.77 | 2514.44 | 3407.54 | 6332.64 | 6037.62 | 3705.27 | 3679.42 | 1800.10 |
| 2015      | 1870.44 | 1484.44 | 2467.22 | 3359.42 | 6276.38 | 5967.25 | 3625.53 | 3616.40 | 1785.08 |
| 2020      | 1744.88 | 1445.99 | 2390.51 | 3239.08 | 6127.30 | 5744.13 | 3454.53 | 3493.35 | 1754.95 |
| 2000–2005 | −62.97  | −24.09  | −54.97  | −105.83 | 93.04   | 4.26    | −104.49 | −48.74  | 15.53   |
| 2005–2010 | −57.11  | −22.64  | −41.57  | −53.44  | −27.24  | −65.84  | −84.85  | −56.21  | −5.83   |
| 2010–2015 | −47.31  | −30.33  | −47.22  | −48.12  | −56.26  | −70.37  | −79.74  | −63.03  | −15.02  |
| 2015–2020 | −125.56 | −38.45  | −76.71  | −120.34 | −149.08 | −223.12 | −171.00 | −123.05 | −30.12  |

Note: FP-food production; RMP-raw material production; GR-gas regulation; CR-climate regulation; HR-hydrology regulation; WT-waste treatment; SC-soil conservation; BM-biodiversity maintenance; ALP-aesthetic landscape provision.

**Table S9** Values of all ecosystem services functions in the RAMR (million yuan).

| Type      | FP      | RMP     | GR        | CR        | HR        | WT        | SC        | BM        | ALP     |
|-----------|---------|---------|-----------|-----------|-----------|-----------|-----------|-----------|---------|
| 2000      | 6774.26 | 5877.41 | 10,235.76 | 12,451.06 | 12,862.22 | 13,606.36 | 14,896.85 | 12,876.05 | 4611.63 |
| 2005      | 6723.39 | 5856.02 | 10,191.86 | 12,387.43 | 12,894.51 | 13,586.89 | 14,812.50 | 12,828.57 | 4615.93 |
| 2010      | 6699.25 | 5847.05 | 10,177.53 | 12,388.07 | 12,870.36 | 13,556.99 | 14,778.39 | 12,804.16 | 4612.96 |
| 2015      | 6666.16 | 5826.54 | 10,144.38 | 12,362.95 | 12,919.13 | 13,576.26 | 14,719.48 | 12,773.00 | 4623.08 |
| 2020      | 6372.44 | 5756.83 | 9921.60   | 11,803.54 | 12,963.45 | 13,247.52 | 14,262.17 | 12,515.43 | 4603.63 |
| 2000–2005 | −50.86  | −21.39  | −43.90    | −63.63    | 32.30     | −19.47    | −84.36    | −47.48    | 4.30    |
| 2005–2010 | −24.14  | −8.97   | −14.33    | 0.64      | −24.16    | −29.91    | −34.11    | −24.41    | −2.97   |
| 2010–2015 | −33.09  | −20.51  | −33.15    | −25.12    | 48.77     | 19.28     | −58.90    | −31.16    | 10.13   |
| 2015–2020 | −293.71 | −69.71  | −222.79   | −559.41   | 44.31     | −328.74   | −457.31   | −257.57   | −19.45  |

\* FP-food production; RMP-raw material production; GR-gas regulation; CR-climate regulation; HR-hydrology regulation;

WT-waste treatment; SC-soil conservation; BM-biodiversity maintenance; ALP-aesthetic landscape provision.

**Table S10** Values of all ecosystem services functions in the RAER (million yuan).

| Type      | FP      | RMP     | GR      | CR        | HR        | WT        | SC        | BM        | ALP     |
|-----------|---------|---------|---------|-----------|-----------|-----------|-----------|-----------|---------|
| 2000      | 7944.65 | 4561.80 | 8493.04 | 11,918.93 | 14,704.64 | 17,206.82 | 14,213.92 | 11,904.94 | 4348.70 |
| 2005      | 7865.51 | 4523.50 | 8379.70 | 11,685.66 | 14,951.91 | 17,291.63 | 14,028.51 | 11,821.95 | 4374.89 |
| 2010      | 7800.27 | 4498.76 | 8339.13 | 11,670.46 | 14,982.04 | 17,275.83 | 13,934.67 | 11,770.34 | 4387.12 |
| 2015      | 7748.85 | 4478.06 | 8302.83 | 11,629.73 | 14,961.96 | 17,222.35 | 13,859.33 | 11,721.15 | 4383.86 |
| 2020      | 7626.14 | 4291.32 | 7858.75 | 11,088.58 | 15,136.50 | 17,296.43 | 13,271.15 | 11,287.82 | 4280.41 |
| 2000–2005 | −79.14  | −38.30  | −113.33 | −233.27   | 247.27    | 84.82     | −185.41   | −82.99    | 26.19   |
| 2005–2010 | −65.24  | −24.74  | −40.57  | −15.20    | 30.13     | −15.80    | −93.84    | −51.61    | 12.23   |
| 2010–2015 | −51.42  | −20.70  | −36.31  | −40.73    | −20.08    | −53.48    | −75.34    | −49.19    | −3.26   |
| 2015–2020 | −122.71 | −186.75 | −444.07 | −541.14   | 174.54    | 74.08     | −588.19   | −433.33   | −103.45 |

\* FP-food production; RMP-raw material production; GR-gas regulation; CR-climate regulation; HR-hydrology regulation; WT-waste treatment; SC-soil conservation; BM-biodiversity maintenance; ALP-aesthetic landscape provision.
